# Supplementary material
Source: publisher figshare collection journal article supplement (https://acs.figshare.com/ndownloader/files/4418314)
Supplement: Supplementary file 1 [file 4418314]

 
data_p-1 
  
_audit_creation_method            SHELXL-97 
_chemical_name_systematic 
; 
 ? 
; 
_chemical_name_common             ? 
_chemical_melting_point           ? 
_chemical_formula_moiety          ? 
_chemical_formula_sum 
 'C16 H10 I2' 
_chemical_formula_weight          456.04 
  
loop_ 
 _atom_type_symbol 
 _atom_type_description 
 _atom_type_scat_dispersion_real 
 _atom_type_scat_dispersion_imag 
 _atom_type_scat_source 
 'C'  'C'   0.0033   0.0016 
 'International Tables Vol C Tables 4.2.6.8 and 6.1.1.4' 
 'H'  'H'   0.0000   0.0000 
 'International Tables Vol C Tables 4.2.6.8 and 6.1.1.4' 
 'I'  'I'  -0.4742   1.8119 
 'International Tables Vol C Tables 4.2.6.8 and 6.1.1.4' 
  
_symmetry_cell_setting            Triclinic 
_symmetry_space_group_name_H-M    P-1 
  
loop_ 
 _symmetry_equiv_pos_as_xyz 
 'x, y, z' 
 '-x, -y, -z' 
  
_cell_length_a                    9.1655(16) 
_cell_length_b                    12.387(2) 
_cell_length_c                    13.582(3) 
_cell_angle_alpha                 76.687(3) 
_cell_angle_beta                  77.515(4) 
_cell_angle_gamma                 85.659(3) 
_cell_volume                      1464.6(5) 
_cell_formula_units_Z             4 
_cell_measurement_temperature     296(2) 
_cell_measurement_reflns_used     3532 
_cell_measurement_theta_min       2.55 
_cell_measurement_theta_max       26.07 
  
_exptl_crystal_description        block
_exptl_crystal_colour             colorless 
_exptl_crystal_size_max           0.38 
_exptl_crystal_size_mid           0.35 
_exptl_crystal_size_min           0.33 
_exptl_crystal_density_meas       ? 
_exptl_crystal_density_diffrn     2.068 
_exptl_crystal_density_method     'not measured' 
_exptl_crystal_F_000              848 
_exptl_absorpt_coefficient_mu     4.274 
_exptl_absorpt_correction_type    multi-scan 
_exptl_absorpt_correction_T_min   0.2935 
_exptl_absorpt_correction_T_max   0.3328 
_exptl_absorpt_process_details    SADABS 
  
_exptl_special_details 
; 
 ? 
; 
  
_diffrn_ambient_temperature       296(2) 
_diffrn_radiation_wavelength      0.71073 
_diffrn_radiation_type            MoK\a 
_diffrn_radiation_source          'fine-focus sealed tube' 
_diffrn_radiation_monochromator   graphite 
_diffrn_measurement_device_type   'Bruker APEX-II CCD' 
_diffrn_measurement_method        '\f and \w scans' 
_diffrn_detector_area_resol_mean  ? 
_diffrn_reflns_number             8153 
_diffrn_reflns_av_R_equivalents   0.0259 
_diffrn_reflns_av_sigmaI/netI     0.0473 
_diffrn_reflns_limit_h_min        -11 
_diffrn_reflns_limit_h_max        8 
_diffrn_reflns_limit_k_min        -15 
_diffrn_reflns_limit_k_max        15 
_diffrn_reflns_limit_l_min        -16 
_diffrn_reflns_limit_l_max        16 
_diffrn_reflns_theta_min          1.69 
_diffrn_reflns_theta_max          26.00 
_reflns_number_total              5648 
_reflns_number_gt                 4298 
_reflns_threshold_expression      >2sigma(I) 
  
_computing_data_collection        'Bruker APEX2' 
_computing_cell_refinement        'Bruker SAINT' 
_computing_data_reduction         'Bruker SAINT' 
_computing_structure_solution     'SHELXS-97 (Sheldrick, 2008)' 
_computing_structure_refinement   'SHELXL-97 (Sheldrick, 2008)' 
_computing_molecular_graphics     'Bruker SHELXTL' 
_computing_publication_material   'Bruker SHELXTL' 
  
_refine_special_details 
; 
 Refinement of F^2^ against ALL reflections.  The weighted R-factor wR and 
 goodness of fit S are based on F^2^, conventional R-factors R are based 
 on F, with F set to zero for negative F^2^. The threshold expression of 
 F^2^ > 2sigma(F^2^) is used only for calculating R-factors(gt) etc. and is 
 not relevant to the choice of reflections for refinement.  R-factors based 
 on F^2^ are statistically about twice as large as those based on F, and R- 
 factors based on ALL data will be even larger. 
; 
  
_refine_ls_structure_factor_coef  Fsqd 
_refine_ls_matrix_type            full 
_refine_ls_weighting_scheme       calc 
_refine_ls_weighting_details 
 'calc w=1/[\s^2^(Fo^2^)+(0.0544P)^2^+4.3766P] where P=(Fo^2^+2Fc^2^)/3' 
_atom_sites_solution_primary      direct 
_atom_sites_solution_secondary    difmap 
_atom_sites_solution_hydrogens    geom 
_refine_ls_hydrogen_treatment     constr
_refine_ls_extinction_method      none 
_refine_ls_extinction_coef        ? 
_refine_ls_number_reflns          5648 
_refine_ls_number_parameters      325 
_refine_ls_number_restraints      0 
_refine_ls_R_factor_all           0.0619 
_refine_ls_R_factor_gt            0.0462 
_refine_ls_wR_factor_ref          0.1266 
_refine_ls_wR_factor_gt           0.1160 
_refine_ls_goodness_of_fit_ref    1.012 
_refine_ls_restrained_S_all       1.012 
_refine_ls_shift/su_max           0.001 
_refine_ls_shift/su_mean          0.000 
  
loop_ 
 _atom_site_label 
 _atom_site_type_symbol 
 _atom_site_fract_x 
 _atom_site_fract_y 
 _atom_site_fract_z 
 _atom_site_U_iso_or_equiv 
 _atom_site_adp_type 
 _atom_site_occupancy 
 _atom_site_symmetry_multiplicity 
 _atom_site_calc_flag 
 _atom_site_refinement_flags 
 _atom_site_disorder_assembly 
 _atom_site_disorder_group 
C1 C -0.0516(8) 0.3795(5) 0.7657(5) 0.0476(16) Uani 1 1 d . . . 
C2 C -0.1343(9) 0.3200(5) 0.7205(6) 0.0557(18) Uani 1 1 d . . . 
C3 C -0.0857(11) 0.3091(6) 0.6229(7) 0.067(2) Uani 1 1 d . . . 
H3 H -0.1415 0.2695 0.5944 0.080 Uiso 1 1 calc R . . 
C4 C 0.0485(11) 0.3566(6) 0.5627(6) 0.062(2) Uani 1 1 d . . . 
C5 C 0.1037(14) 0.3433(8) 0.4611(7) 0.081(3) Uani 1 1 d . . . 
H5 H 0.0529 0.2997 0.4329 0.097 Uiso 1 1 calc R . . 
C6 C 0.2313(17) 0.3938(11) 0.4038(7) 0.107(5) Uani 1 1 d . . . 
H6 H 0.2654 0.3848 0.3365 0.129 Uiso 1 1 calc R . . 
C7 C 0.3127(12) 0.4592(9) 0.4438(6) 0.082(3) Uani 1 1 d . . . 
H7 H 0.3992 0.4936 0.4038 0.098 Uiso 1 1 calc R . . 
C8 C 0.2610(10) 0.4708(7) 0.5433(5) 0.063(2) Uani 1 1 d . . . 
H8 H 0.3137 0.5139 0.5707 0.076 Uiso 1 1 calc R . . 
C9 C 0.1309(8) 0.4197(6) 0.6052(5) 0.0498(17) Uani 1 1 d . . . 
C10 C 0.0768(8) 0.4306(5) 0.7091(5) 0.0444(15) Uani 1 1 d . . . 
C11 C 0.1626(8) 0.4996(6) 0.7529(5) 0.0474(16) Uani 1 1 d . . . 
C12 C 0.2944(9) 0.4597(8) 0.7822(6) 0.065(2) Uani 1 1 d . . . 
H12 H 0.3313 0.3889 0.7764 0.078 Uiso 1 1 calc R . . 
C13 C 0.3723(10) 0.5284(11) 0.8211(7) 0.089(3) Uani 1 1 d . . . 
H13 H 0.4626 0.5033 0.8401 0.106 Uiso 1 1 calc R . . 
C14 C 0.3177(13) 0.6308(10) 0.8313(7) 0.088(3) Uani 1 1 d . . . 
H14 H 0.3695 0.6748 0.8584 0.106 Uiso 1 1 calc R . . 
C15 C 0.1875(13) 0.6692(8) 0.8022(6) 0.081(3) Uani 1 1 d . . . 
H15 H 0.1510 0.7399 0.8087 0.097 Uiso 1 1 calc R . . 
C16 C 0.1091(10) 0.6048(6) 0.7632(5) 0.061(2) Uani 1 1 d . . . 
H16 H 0.0198 0.6318 0.7436 0.074 Uiso 1 1 calc R . . 
C17 C 0.6071(7) 1.0220(5) 0.6552(5) 0.0421(14) Uani 1 1 d . . . 
C18 C 0.5317(8) 1.1009(6) 0.5893(5) 0.0511(17) Uani 1 1 d . . . 
C19 C 0.3823(8) 1.1228(6) 0.6192(6) 0.0579(19) Uani 1 1 d . . . 
H19 H 0.3337 1.1757 0.5760 0.069 Uiso 1 1 calc R . . 
C20 C 0.3024(8) 1.0663(6) 0.7141(5) 0.0514(16) Uani 1 1 d . . . 
C21 C 0.1469(9) 1.0819(8) 0.7458(7) 0.073(2) Uani 1 1 d . . . 
H21 H 0.0973 1.1346 0.7031 0.088 Uiso 1 1 calc R . . 
C22 C 0.0678(9) 1.0252(8) 0.8336(8) 0.079(3) Uani 1 1 d . . . 
H22 H -0.0351 1.0373 0.8507 0.094 Uiso 1 1 calc R . . 
C23 C 0.1402(8) 0.9470(7) 0.9004(6) 0.063(2) Uani 1 1 d . . . 
H23 H 0.0852 0.9071 0.9621 0.076 Uiso 1 1 calc R . . 
C24 C 0.2904(7) 0.9291(6) 0.8757(5) 0.0479(15) Uani 1 1 d . . . 
H24 H 0.3373 0.8778 0.9213 0.058 Uiso 1 1 calc R . . 
C25 C 0.3759(7) 0.9867(5) 0.7825(5) 0.0411(14) Uani 1 1 d . . . 
C26 C 0.5333(7) 0.9672(5) 0.7517(5) 0.0373(13) Uani 1 1 d . . . 
C27 C 0.6097(7) 0.8847(5) 0.8232(5) 0.0411(14) Uani 1 1 d . . . 
C28 C 0.6463(9) 0.9124(6) 0.9070(6) 0.0578(18) Uani 1 1 d . . . 
H28 H 0.6254 0.9832 0.9197 0.069 Uiso 1 1 calc R . . 
C29 C 0.7171(10) 0.8295(9) 0.9734(6) 0.078(3) Uani 1 1 d . . . 
H29 H 0.7435 0.8462 1.0305 0.094 Uiso 1 1 calc R . . 
C30 C 0.7460(10) 0.7287(8) 0.9553(8) 0.079(3) Uani 1 1 d . . . 
H30 H 0.7927 0.6758 0.9998 0.095 Uiso 1 1 calc R . . 
C31 C 0.7085(10) 0.7011(7) 0.8729(9) 0.084(3) Uani 1 1 d . . . 
H31 H 0.7277 0.6296 0.8616 0.100 Uiso 1 1 calc R . . 
C32 C 0.6417(9) 0.7803(6) 0.8064(6) 0.0600(19) Uani 1 1 d . . . 
H32 H 0.6179 0.7624 0.7491 0.072 Uiso 1 1 calc R . . 
I1 I -0.12045(6) 0.38592(4) 0.92211(4) 0.05720(16) Uani 1 1 d . . . 
I2 I -0.33934(8) 0.24700(5) 0.80073(7) 0.0964(3) Uani 1 1 d . . . 
I3 I 0.63896(7) 1.19012(5) 0.44360(4) 0.07195(19) Uani 1 1 d . . . 
I4 I 0.83709(6) 0.98805(5) 0.60963(4) 0.06969(18) Uani 1 1 d . . . 
  
loop_ 
 _atom_site_aniso_label 
 _atom_site_aniso_U_11 
 _atom_site_aniso_U_22 
 _atom_site_aniso_U_33 
 _atom_site_aniso_U_23 
 _atom_site_aniso_U_13 
 _atom_site_aniso_U_12 
C1 0.062(4) 0.040(3) 0.043(4) -0.005(3) -0.021(3) 0.007(3) 
C2 0.068(5) 0.041(4) 0.064(5) -0.006(3) -0.034(4) 0.003(3) 
C3 0.103(7) 0.044(4) 0.073(6) -0.016(4) -0.059(5) 0.006(4) 
C4 0.101(6) 0.050(4) 0.049(4) -0.020(3) -0.043(5) 0.030(4) 
C5 0.135(9) 0.076(6) 0.047(5) -0.031(4) -0.044(6) 0.037(6) 
C6 0.162(12) 0.125(9) 0.040(5) -0.038(6) -0.039(7) 0.083(9) 
C7 0.095(7) 0.103(7) 0.038(4) -0.015(5) -0.004(4) 0.029(6) 
C8 0.080(5) 0.074(5) 0.032(4) -0.012(3) -0.008(4) 0.020(4) 
C9 0.067(5) 0.054(4) 0.029(3) -0.010(3) -0.016(3) 0.018(3) 
C10 0.056(4) 0.047(3) 0.031(3) -0.008(3) -0.015(3) 0.007(3) 
C11 0.052(4) 0.059(4) 0.027(3) -0.005(3) -0.003(3) -0.010(3) 
C12 0.055(5) 0.095(6) 0.050(4) -0.025(4) -0.010(4) -0.003(4) 
C13 0.054(5) 0.155(10) 0.065(6) -0.040(6) -0.006(4) -0.025(6) 
C14 0.091(7) 0.131(9) 0.047(5) -0.035(5) 0.016(5) -0.064(7) 
C15 0.114(8) 0.077(6) 0.048(5) -0.021(4) 0.013(5) -0.048(6) 
C16 0.088(6) 0.063(5) 0.031(4) -0.009(3) -0.006(4) -0.015(4) 
C17 0.040(3) 0.046(3) 0.039(3) -0.012(3) -0.002(3) -0.007(3) 
C18 0.065(5) 0.051(4) 0.034(3) -0.002(3) -0.006(3) -0.013(3) 
C19 0.054(4) 0.060(4) 0.056(4) 0.001(4) -0.021(4) 0.006(3) 
C20 0.049(4) 0.056(4) 0.043(4) -0.001(3) -0.008(3) 0.002(3) 
C21 0.049(4) 0.085(6) 0.073(6) 0.003(5) -0.015(4) 0.018(4) 
C22 0.042(4) 0.095(7) 0.085(7) -0.010(5) 0.001(4) 0.009(4) 
C23 0.046(4) 0.077(5) 0.054(5) -0.006(4) 0.010(3) -0.003(4) 
C24 0.044(4) 0.051(4) 0.043(4) -0.007(3) 0.000(3) -0.005(3) 
C25 0.041(3) 0.045(3) 0.034(3) -0.007(3) -0.002(3) -0.002(3) 
C26 0.038(3) 0.040(3) 0.033(3) -0.007(2) -0.004(2) -0.004(2) 
C27 0.034(3) 0.041(3) 0.045(4) -0.005(3) -0.006(3) -0.005(3) 
C28 0.065(5) 0.058(4) 0.050(4) -0.003(3) -0.019(4) -0.009(4) 
C29 0.068(5) 0.110(8) 0.051(5) 0.017(5) -0.033(4) -0.022(5) 
C30 0.060(5) 0.079(6) 0.080(7) 0.026(5) -0.023(5) 0.003(4) 
C31 0.077(6) 0.057(5) 0.107(8) 0.001(5) -0.022(6) 0.019(4) 
C32 0.063(5) 0.056(4) 0.059(5) -0.010(4) -0.016(4) 0.009(4) 
I1 0.0649(3) 0.0596(3) 0.0390(3) -0.0023(2) -0.0010(2) -0.0057(2) 
I2 0.0836(5) 0.0728(4) 0.1376(7) -0.0051(4) -0.0444(4) -0.0246(3) 
I3 0.0894(4) 0.0780(4) 0.0384(3) 0.0067(2) -0.0048(2) -0.0239(3) 
I4 0.0441(3) 0.0818(4) 0.0674(4) -0.0062(3) 0.0121(2) -0.0034(2) 
  
_geom_special_details 
; 
 All esds (except the esd in the dihedral angle between two l.s. planes) 
 are estimated using the full covariance matrix.  The cell esds are taken 
 into account individually in the estimation of esds in distances, angles 
 and torsion angles; correlations between esds in cell parameters are only 
 used when they are defined by crystal symmetry.  An approximate (isotropic) 
 treatment of cell esds is used for estimating esds involving l.s. planes. 
; 
  
loop_ 
 _geom_bond_atom_site_label_1 
 _geom_bond_atom_site_label_2 
 _geom_bond_distance 
 _geom_bond_site_symmetry_2 
 _geom_bond_publ_flag 
C1 C10 1.368(10) . ? 
C1 C2 1.411(9) . ? 
C1 I1 2.099(7) . ? 
C2 C3 1.339(12) . ? 
C2 I2 2.111(8) . ? 
C3 C4 1.407(13) . ? 
C3 H3 0.9300 . ? 
C4 C5 1.406(12) . ? 
C4 C9 1.414(11) . ? 
C5 C6 1.363(17) . ? 
C5 H5 0.9300 . ? 
C6 C7 1.406(16) . ? 
C6 H6 0.9300 . ? 
C7 C8 1.369(10) . ? 
C7 H7 0.9300 . ? 
C8 C9 1.401(11) . ? 
C8 H8 0.9300 . ? 
C9 C10 1.426(9) . ? 
C10 C11 1.497(9) . ? 
C11 C12 1.375(10) . ? 
C11 C16 1.384(10) . ? 
C12 C13 1.406(12) . ? 
C12 H12 0.9300 . ? 
C13 C14 1.354(15) . ? 
C13 H13 0.9300 . ? 
C14 C15 1.356(15) . ? 
C14 H14 0.9300 . ? 
C15 C16 1.371(11) . ? 
C15 H15 0.9300 . ? 
C16 H16 0.9300 . ? 
C17 C26 1.383(8) . ? 
C17 C18 1.413(10) . ? 
C17 I4 2.103(6) . ? 
C18 C19 1.367(10) . ? 
C18 I3 2.102(6) . ? 
C19 C20 1.393(10) . ? 
C19 H19 0.9300 . ? 
C20 C21 1.409(10) . ? 
C20 C25 1.428(9) . ? 
C21 C22 1.326(12) . ? 
C21 H21 0.9300 . ? 
C22 C23 1.400(12) . ? 
C22 H22 0.9300 . ? 
C23 C24 1.358(10) . ? 
C23 H23 0.9300 . ? 
C24 C25 1.402(9) . ? 
C24 H24 0.9300 . ? 
C25 C26 1.431(8) . ? 
C26 C27 1.485(8) . ? 
C27 C32 1.364(10) . ? 
C27 C28 1.373(10) . ? 
C28 C29 1.420(11) . ? 
C28 H28 0.9300 . ? 
C29 C30 1.325(14) . ? 
C29 H29 0.9300 . ? 
C30 C31 1.359(14) . ? 
C30 H30 0.9300 . ? 
C31 C32 1.376(11) . ? 
C31 H31 0.9300 . ? 
C32 H32 0.9300 . ? 
  
loop_ 
 _geom_angle_atom_site_label_1 
 _geom_angle_atom_site_label_2 
 _geom_angle_atom_site_label_3 
 _geom_angle 
 _geom_angle_site_symmetry_1 
 _geom_angle_site_symmetry_3 
 _geom_angle_publ_flag 
C10 C1 C2 120.4(7) . . ? 
C10 C1 I1 119.4(5) . . ? 
C2 C1 I1 120.2(5) . . ? 
C3 C2 C1 120.6(8) . . ? 
C3 C2 I2 117.1(6) . . ? 
C1 C2 I2 122.3(6) . . ? 
C2 C3 C4 121.2(7) . . ? 
C2 C3 H3 119.4 . . ? 
C4 C3 H3 119.4 . . ? 
C5 C4 C3 122.0(9) . . ? 
C5 C4 C9 118.7(9) . . ? 
C3 C4 C9 119.3(7) . . ? 
C6 C5 C4 120.3(9) . . ? 
C6 C5 H5 119.8 . . ? 
C4 C5 H5 119.8 . . ? 
C5 C6 C7 121.8(8) . . ? 
C5 C6 H6 119.1 . . ? 
C7 C6 H6 119.1 . . ? 
C8 C7 C6 118.2(10) . . ? 
C8 C7 H7 120.9 . . ? 
C6 C7 H7 120.9 . . ? 
C7 C8 C9 122.0(9) . . ? 
C7 C8 H8 119.0 . . ? 
C9 C8 H8 119.0 . . ? 
C8 C9 C4 119.0(7) . . ? 
C8 C9 C10 122.4(7) . . ? 
C4 C9 C10 118.6(7) . . ? 
C1 C10 C9 119.9(6) . . ? 
C1 C10 C11 121.8(6) . . ? 
C9 C10 C11 118.3(6) . . ? 
C12 C11 C16 119.8(7) . . ? 
C12 C11 C10 120.5(7) . . ? 
C16 C11 C10 119.6(6) . . ? 
C11 C12 C13 118.4(9) . . ? 
C11 C12 H12 120.8 . . ? 
C13 C12 H12 120.8 . . ? 
C14 C13 C12 120.9(9) . . ? 
C14 C13 H13 119.5 . . ? 
C12 C13 H13 119.5 . . ? 
C13 C14 C15 120.1(9) . . ? 
C13 C14 H14 120.0 . . ? 
C15 C14 H14 120.0 . . ? 
C14 C15 C16 120.6(10) . . ? 
C14 C15 H15 119.7 . . ? 
C16 C15 H15 119.7 . . ? 
C15 C16 C11 120.2(9) . . ? 
C15 C16 H16 119.9 . . ? 
C11 C16 H16 119.9 . . ? 
C26 C17 C18 121.2(6) . . ? 
C26 C17 I4 118.3(5) . . ? 
C18 C17 I4 120.4(5) . . ? 
C19 C18 C17 120.2(6) . . ? 
C19 C18 I3 116.7(5) . . ? 
C17 C18 I3 123.0(5) . . ? 
C18 C19 C20 120.4(6) . . ? 
C18 C19 H19 119.8 . . ? 
C20 C19 H19 119.8 . . ? 
C19 C20 C21 122.4(7) . . ? 
C19 C20 C25 120.6(6) . . ? 
C21 C20 C25 117.0(6) . . ? 
C22 C21 C20 123.3(7) . . ? 
C22 C21 H21 118.4 . . ? 
C20 C21 H21 118.4 . . ? 
C21 C22 C23 119.5(7) . . ? 
C21 C22 H22 120.2 . . ? 
C23 C22 H22 120.2 . . ? 
C24 C23 C22 120.4(7) . . ? 
C24 C23 H23 119.8 . . ? 
C22 C23 H23 119.8 . . ? 
C23 C24 C25 121.1(7) . . ? 
C23 C24 H24 119.5 . . ? 
C25 C24 H24 119.5 . . ? 
C24 C25 C20 118.7(6) . . ? 
C24 C25 C26 122.8(6) . . ? 
C20 C25 C26 118.4(6) . . ? 
C17 C26 C25 119.0(5) . . ? 
C17 C26 C27 122.5(6) . . ? 
C25 C26 C27 118.4(5) . . ? 
C32 C27 C28 119.8(6) . . ? 
C32 C27 C26 119.7(6) . . ? 
C28 C27 C26 120.5(6) . . ? 
C27 C28 C29 117.8(8) . . ? 
C27 C28 H28 121.1 . . ? 
C29 C28 H28 121.1 . . ? 
C30 C29 C28 120.9(8) . . ? 
C30 C29 H29 119.5 . . ? 
C28 C29 H29 119.5 . . ? 
C29 C30 C31 121.2(8) . . ? 
C29 C30 H30 119.4 . . ? 
C31 C30 H30 119.4 . . ? 
C30 C31 C32 119.1(9) . . ? 
C30 C31 H31 120.5 . . ? 
C32 C31 H31 120.5 . . ? 
C27 C32 C31 121.1(8) . . ? 
C27 C32 H32 119.4 . . ? 
C31 C32 H32 119.4 . . ? 
  
loop_ 
 _geom_torsion_atom_site_label_1 
 _geom_torsion_atom_site_label_2 
 _geom_torsion_atom_site_label_3 
 _geom_torsion_atom_site_label_4 
 _geom_torsion 
 _geom_torsion_site_symmetry_1 
 _geom_torsion_site_symmetry_2 
 _geom_torsion_site_symmetry_3 
 _geom_torsion_site_symmetry_4 
 _geom_torsion_publ_flag 
C10 C1 C2 C3 2.5(10) . . . . ? 
I1 C1 C2 C3 -175.4(5) . . . . ? 
C10 C1 C2 I2 -176.5(5) . . . . ? 
I1 C1 C2 I2 5.6(7) . . . . ? 
C1 C2 C3 C4 -0.2(11) . . . . ? 
I2 C2 C3 C4 178.9(5) . . . . ? 
C2 C3 C4 C5 178.1(7) . . . . ? 
C2 C3 C4 C9 -1.9(11) . . . . ? 
C3 C4 C5 C6 177.6(8) . . . . ? 
C9 C4 C5 C6 -2.4(12) . . . . ? 
C4 C5 C6 C7 0.8(14) . . . . ? 
C5 C6 C7 C8 0.4(14) . . . . ? 
C6 C7 C8 C9 0.1(12) . . . . ? 
C7 C8 C9 C4 -1.7(11) . . . . ? 
C7 C8 C9 C10 179.5(7) . . . . ? 
C5 C4 C9 C8 2.8(10) . . . . ? 
C3 C4 C9 C8 -177.2(6) . . . . ? 
C5 C4 C9 C10 -178.3(6) . . . . ? 
C3 C4 C9 C10 1.6(10) . . . . ? 
C2 C1 C10 C9 -2.7(9) . . . . ? 
I1 C1 C10 C9 175.2(4) . . . . ? 
C2 C1 C10 C11 176.5(6) . . . . ? 
I1 C1 C10 C11 -5.6(8) . . . . ? 
C8 C9 C10 C1 179.5(6) . . . . ? 
C4 C9 C10 C1 0.6(9) . . . . ? 
C8 C9 C10 C11 0.2(10) . . . . ? 
C4 C9 C10 C11 -178.6(6) . . . . ? 
C1 C10 C11 C12 105.1(8) . . . . ? 
C9 C10 C11 C12 -75.6(8) . . . . ? 
C1 C10 C11 C16 -75.4(8) . . . . ? 
C9 C10 C11 C16 103.9(7) . . . . ? 
C16 C11 C12 C13 -0.6(11) . . . . ? 
C10 C11 C12 C13 178.9(7) . . . . ? 
C11 C12 C13 C14 1.1(13) . . . . ? 
C12 C13 C14 C15 -1.2(14) . . . . ? 
C13 C14 C15 C16 0.7(13) . . . . ? 
C14 C15 C16 C11 -0.2(12) . . . . ? 
C12 C11 C16 C15 0.2(10) . . . . ? 
C10 C11 C16 C15 -179.3(6) . . . . ? 
C26 C17 C18 C19 -1.5(10) . . . . ? 
I4 C17 C18 C19 -179.9(5) . . . . ? 
C26 C17 C18 I3 178.2(5) . . . . ? 
I4 C17 C18 I3 -0.2(8) . . . . ? 
C17 C18 C19 C20 -1.0(11) . . . . ? 
I3 C18 C19 C20 179.2(6) . . . . ? 
C18 C19 C20 C21 -176.6(8) . . . . ? 
C18 C19 C20 C25 1.5(11) . . . . ? 
C19 C20 C21 C22 176.7(9) . . . . ? 
C25 C20 C21 C22 -1.4(14) . . . . ? 
C20 C21 C22 C23 1.4(16) . . . . ? 
C21 C22 C23 C24 -0.1(14) . . . . ? 
C22 C23 C24 C25 -1.1(12) . . . . ? 
C23 C24 C25 C20 0.9(10) . . . . ? 
C23 C24 C25 C26 -177.5(7) . . . . ? 
C19 C20 C25 C24 -177.9(7) . . . . ? 
C21 C20 C25 C24 0.3(10) . . . . ? 
C19 C20 C25 C26 0.6(10) . . . . ? 
C21 C20 C25 C26 178.8(7) . . . . ? 
C18 C17 C26 C25 3.5(9) . . . . ? 
I4 C17 C26 C25 -178.0(4) . . . . ? 
C18 C17 C26 C27 -179.3(6) . . . . ? 
I4 C17 C26 C27 -0.8(8) . . . . ? 
C24 C25 C26 C17 175.4(6) . . . . ? 
C20 C25 C26 C17 -3.0(9) . . . . ? 
C24 C25 C26 C27 -1.9(9) . . . . ? 
C20 C25 C26 C27 179.7(6) . . . . ? 
C17 C26 C27 C32 -77.1(8) . . . . ? 
C25 C26 C27 C32 100.2(8) . . . . ? 
C17 C26 C27 C28 104.0(8) . . . . ? 
C25 C26 C27 C28 -78.8(8) . . . . ? 
C32 C27 C28 C29 0.0(11) . . . . ? 
C26 C27 C28 C29 179.0(7) . . . . ? 
C27 C28 C29 C30 -0.4(12) . . . . ? 
C28 C29 C30 C31 -0.2(14) . . . . ? 
C29 C30 C31 C32 1.1(15) . . . . ? 
C28 C27 C32 C31 0.9(12) . . . . ? 
C26 C27 C32 C31 -178.1(7) . . . . ? 
C30 C31 C32 C27 -1.5(14) . . . . ? 
  
_diffrn_measured_fraction_theta_max    0.982 
_diffrn_reflns_theta_full              26.00 
_diffrn_measured_fraction_theta_full   0.982 
_refine_diff_density_max    1.506 
_refine_diff_density_min   -1.452 
_refine_diff_density_rms    0.122 
